# Supplementary material for: Fabrication of graphene oxide decorated with Au–Ag alloy nanoparticles and its superior catalytic performance for the reduction of 4-nitrophenol
Source: Royal Society of Chemistry journal article supplement (doi:10.1039/c3ta10684e), 2013-01-01
Supplement: c3ta10684e.pdf [file c3ta10684e.pdf]

**Electronic Supplementary Information (ESI)**

**Fabrication of graphene oxide decorated with Au-Ag alloy nanoparticles and its superior catalytic performance for the reduction of 4-nitrophenol**

Tao Wu<sup>1</sup>   Lei Zhang<sup>1</sup>   Jianping Gao<sup>\*1</sup>   Yu Liu<sup>1</sup>   Chunjuan Gao<sup>2</sup>

Jing Yan<sup>†1</sup>

(<sup>1</sup>School of Science, Tianjin University, Tianjin, 300072, P. R. China;

<sup>2</sup>Institute of Tianjin Seawater Desalination and Multipurpose Utilization, State Oceanic Administration, Tianjin, 300192, P. R. China)

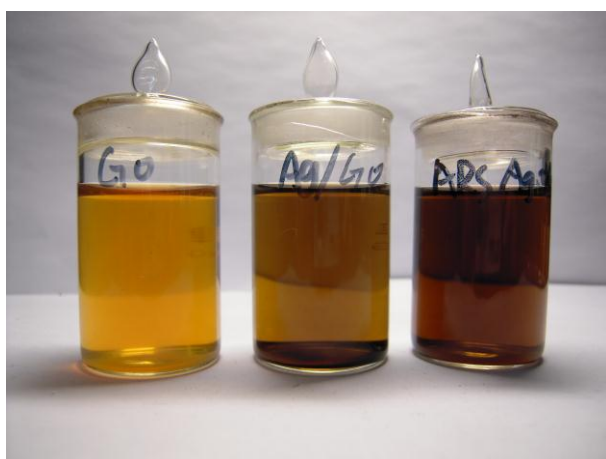

A

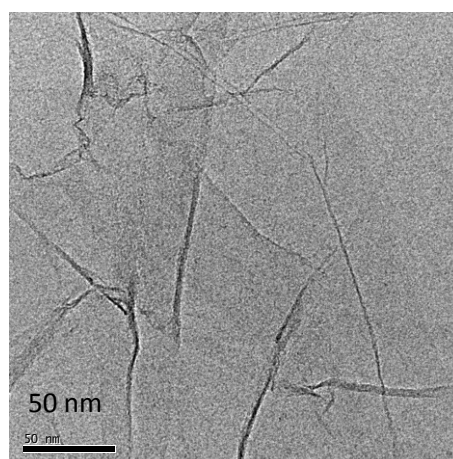

B

---

\* Corresponding authors: Fax: +86 22 274 034 75

E-mail address: [jianpinggao2012@126.com](mailto:jianpinggao2012@126.com) (J. P. Gao).

† Corresponding authors: Fax: +86 22 274 034 75

E-mail address: [yanjings2012@163.com](mailto:yanjings2012@163.com) (J. Yan)

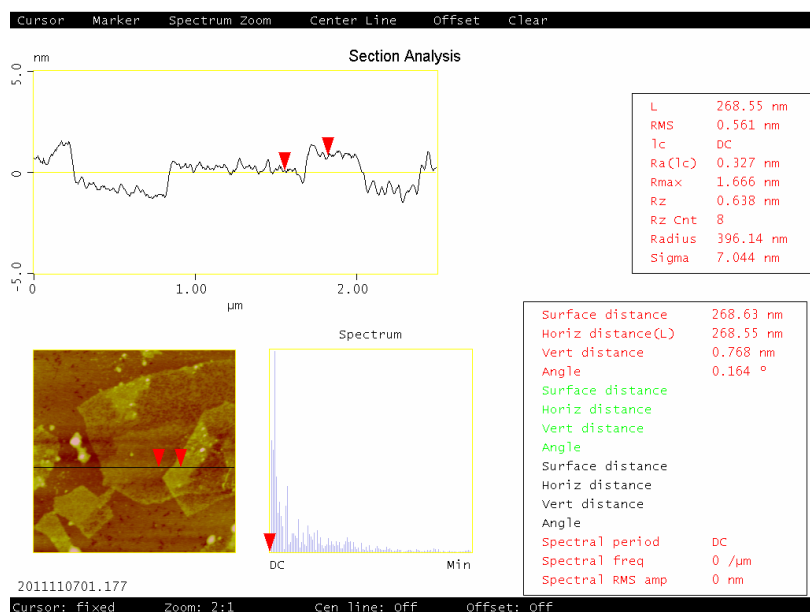

C

Figure S1 (A) Optical photos of stable GO, Ag/GO and Au-Ag/GO (I) suspension (from left to right); (B) the TEM image of GO nanosheets; (C) the AFM image of GO nanosheets

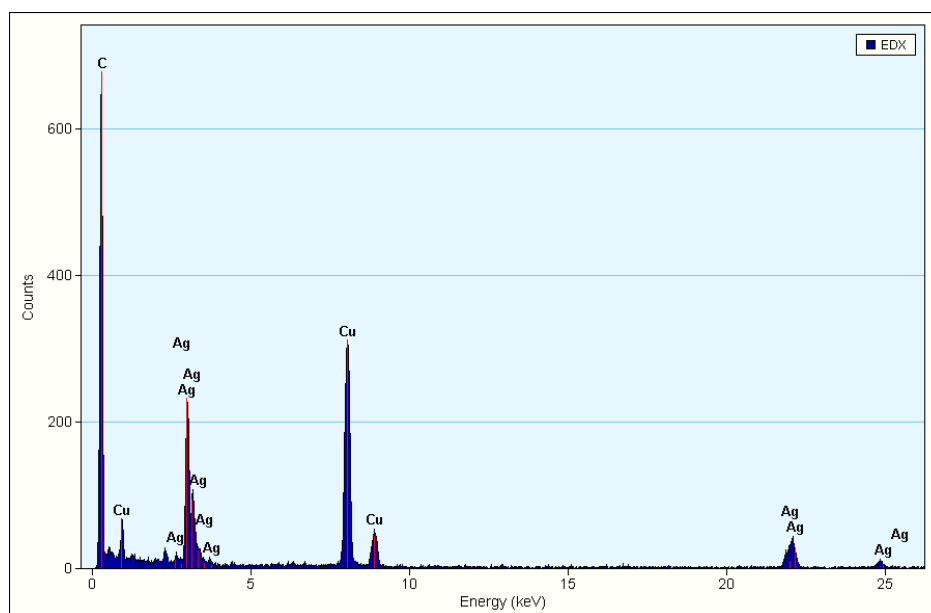

A

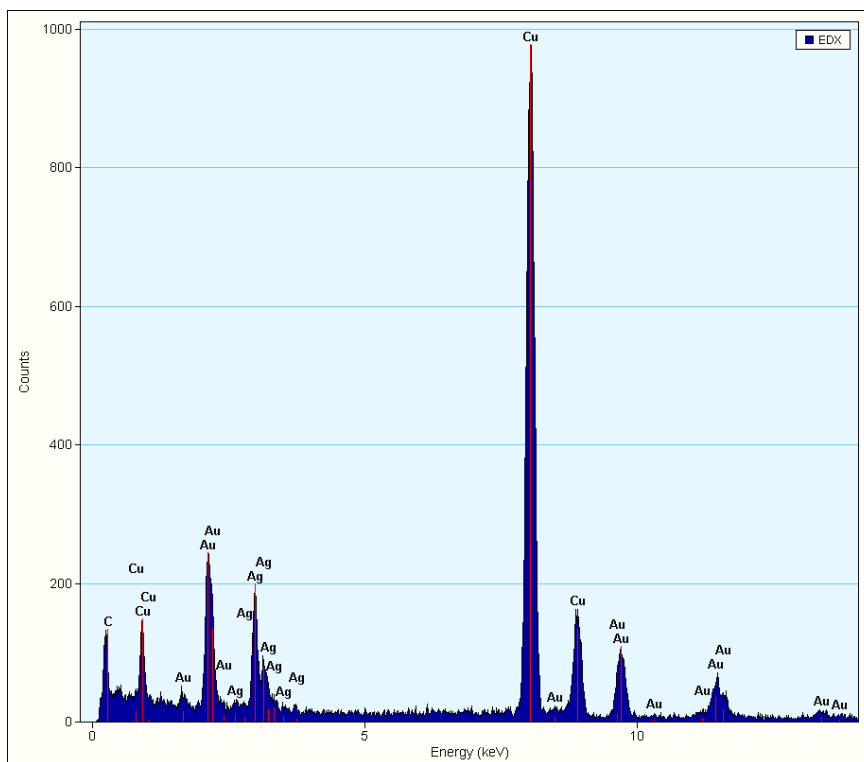

B

Figure S2 EDX spectra of (A) Ag/GO and (B) Au-Ag/GO (I)

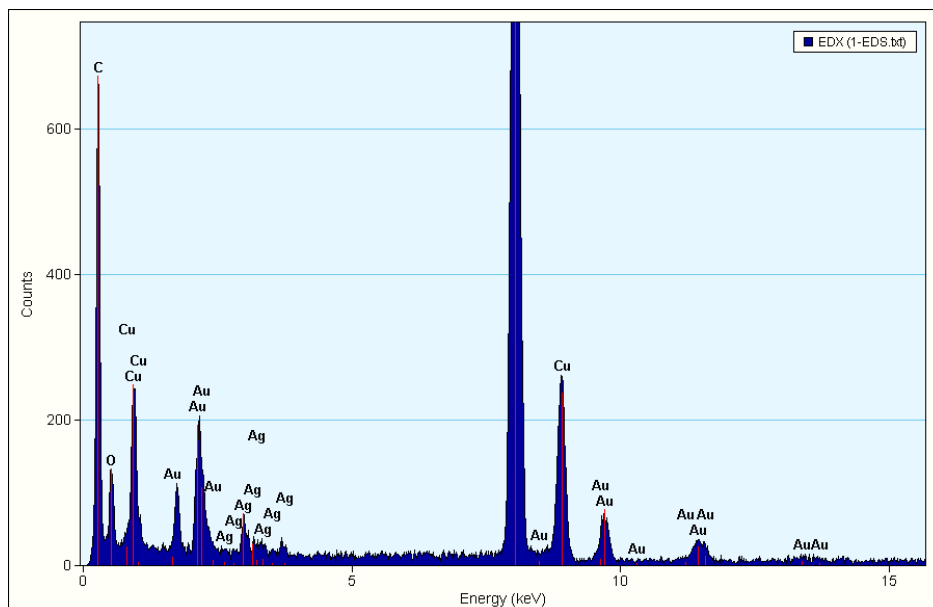

A

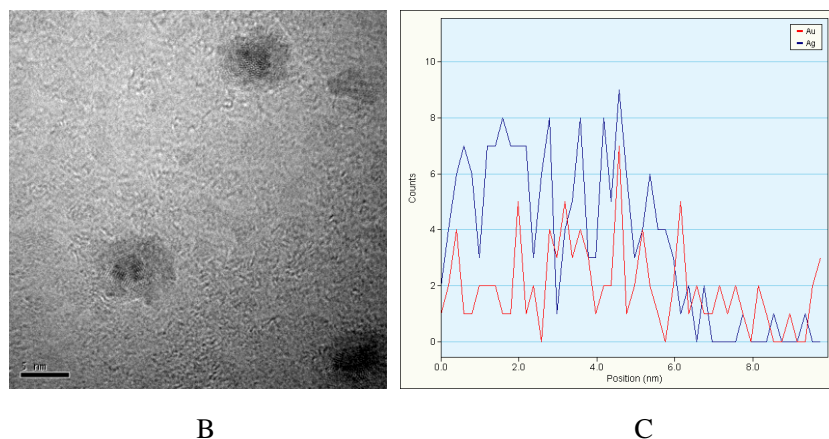

Figure S3 (A) EDX spectrum of Au-Ag/GO (II); (B) HRTEM images of Au-Ag/GO (II); (C) EDX liner scanning image of the NPs in (B)

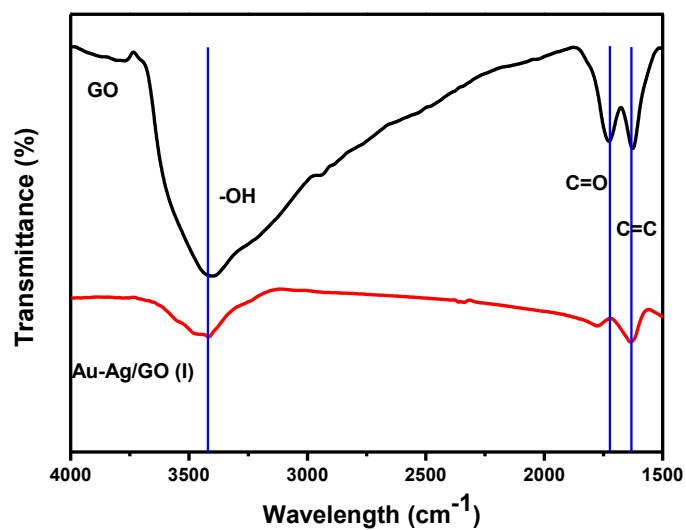

Figure S4 FTIR spectra of GO and Au-Ag/GO (I)

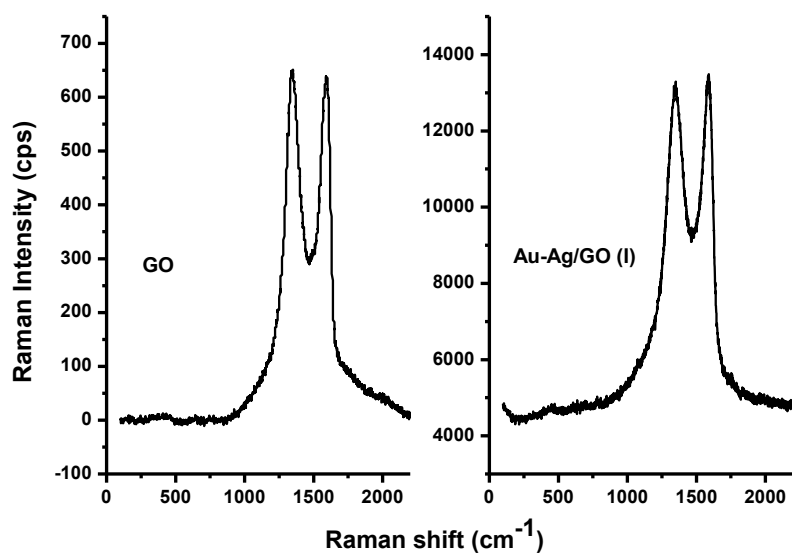

Figure S5 Raman spectra of GO and Au-Ag/GO (I)

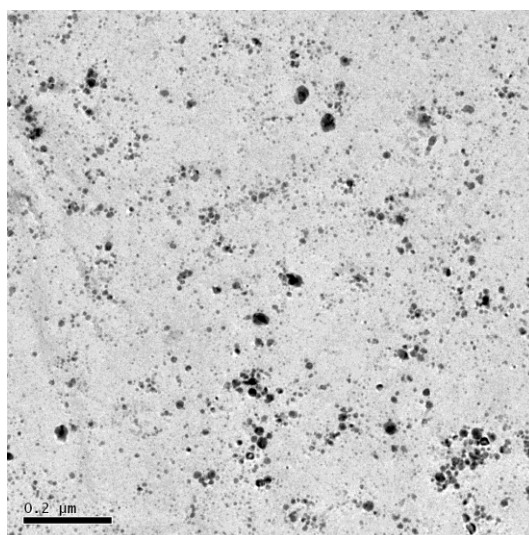

Figure S6 TEM image of Au-Ag/GO (I) after the catalytic test

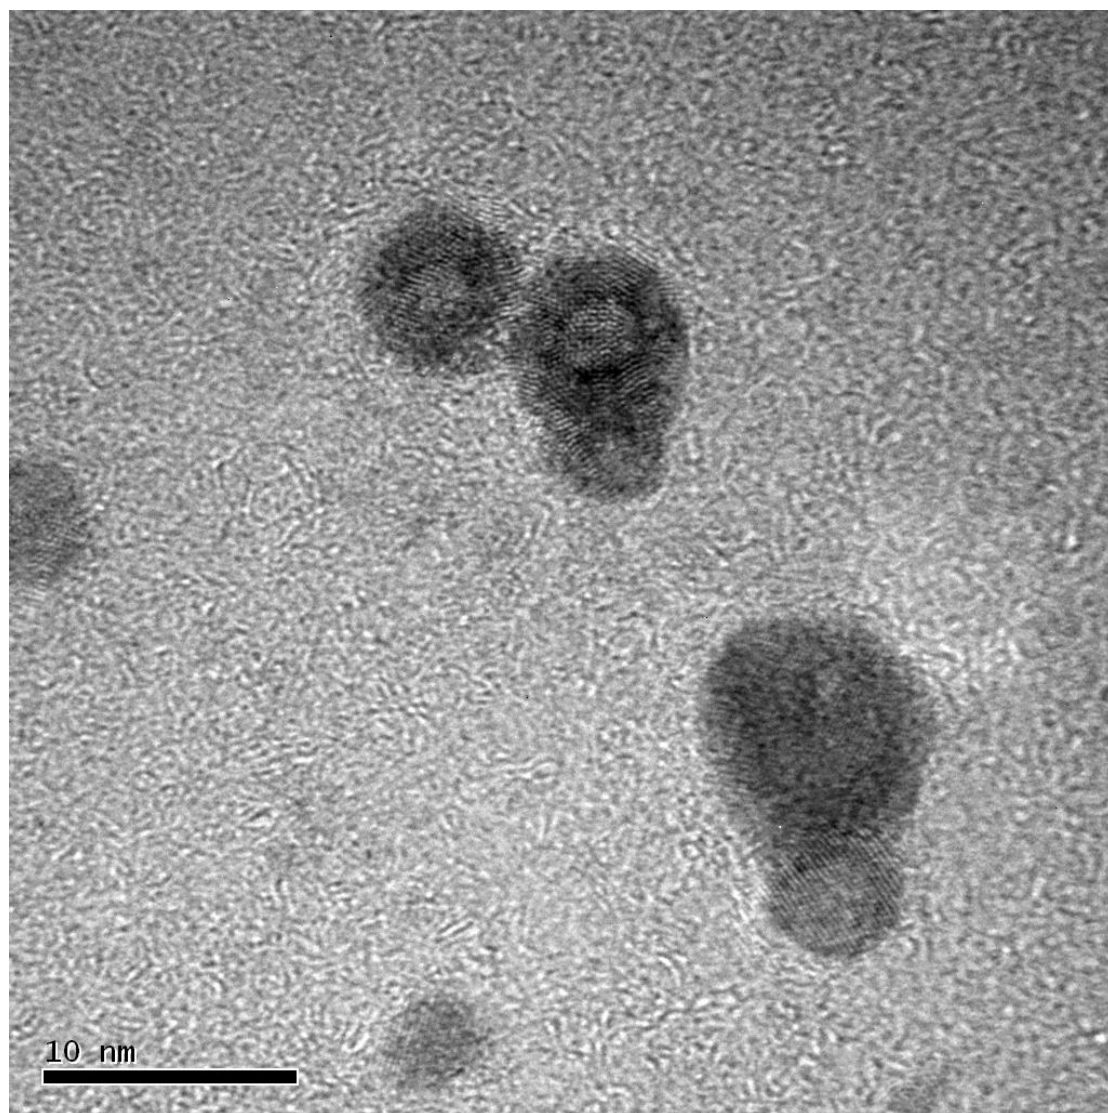

A



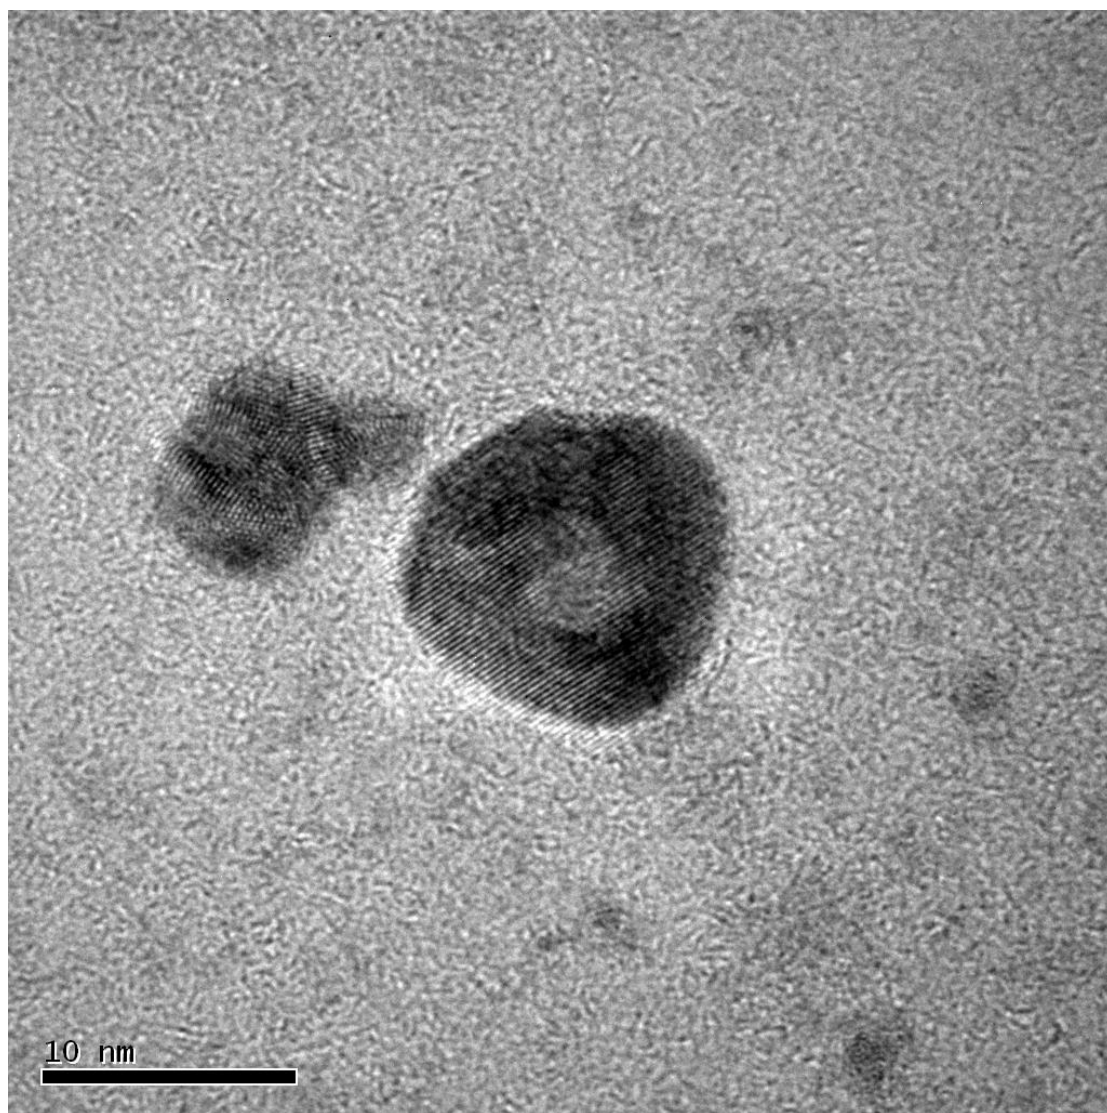

B

Figure S7 (A) the original TEM images of Figure 1F; (B) the original TEM images of  
Figure 1G
